# Supplementary material for: Efficacy of novel activated bamboo charcoal in reducing uremic toxins and enhancing kidney function in chronic kidney disease patients: a pilot randomized controlled trial
Source: PeerJ journal article supplement (doi:10.7717/peerj.19007), 2025-03-12
Supplement: Codebook.docx [file Codebook.docx]

V0: visiting time 0

V1:visiting time 1

V2: visiting time 3

IAa: A+P : ABC+probiotics group

IAb: A: ABC group

IBa: P: Probiotics group

IBb: C: control group

ACEI: Angiotensin converting enzyme inhibitor;

ARB: Angiotensin receptor blocker;

SGLT2i: sodium-glucose cotransporter 2 inhibitor;

AC_sugar—ante cibum sugar;

ANOVA—Analysis of Variance;

BUN—blood urea nitrogen;

Ca—calcium;

DM—diabetes mellitus;

eGFR—estimated glomerular filtration rate;

ALT—alanine aminotransferase;

HbA1c—hemoglobin A1c;

HDL—high-density lipoprotein;

Hct—hematocrit;

IS—indoxyl sulfate;

LDL—low-density lipoprotein;

PCS—p-cresyl sulfate;

PS—phenyl sulfate;

RBC—red blood cell count;

TMAO—trimethylamine N-oxide;

TC—total cholesterol;

TG—triglycerides;

UACR—urinary albumin-to-creatinine ratio;

WBC—white blood cell count.

HF: heart failure

OHA: Oral hypoglycemic agent
